# Supplementary material for: Biomarkers of diabetes risk in the National Diet and Nutrition Survey rolling programme (2008–2011)
Source: PubMed Central journal article supplement (PMC3888635; doi:10.1136/jech-2013-202885), 2013-09-19

**Supplementary Figure 1.** Diagram showing the structure and design of the NDNS rolling programme.

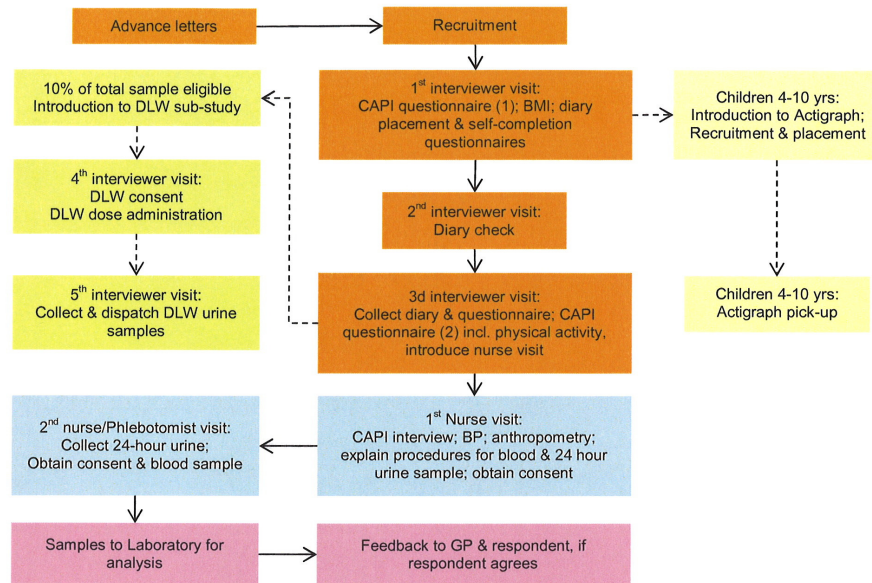

Supplement: jech-2013-202885-s1.pdf [file jech-2013-202885-s1.pdf]
